# Supplementary material for: CRL2ZER1/ZYG11B recognizes small N-terminal residues for degradation
Source: PubMed Central journal article supplement (PMC9741652; doi:10.1038/s41467-022-35169-6), 2022-12-10
Supplement: 41467_2022_35169_MOESM1_ESM.pdf [file 41467_2022_35169_MOESM1_ESM.pdf]

Supplementary information for

**CRL2<sup>ZER1/ZYG11B</sup> recognizes small N-terminal residues for  
degradation**

Yao Li<sup>1#</sup>, Yueling Zhao<sup>2#</sup>, Xiaojie Yan<sup>1#</sup>, Chen Ye<sup>2#</sup>, Sara Weirich<sup>3</sup>, Bing Zhang<sup>1</sup>, Xiaolu Wang<sup>4</sup>,  
Lili Song<sup>2</sup>, Chenhao Jiang<sup>2</sup>, Albert Jeltsch<sup>3</sup>, Cheng Dong<sup>1\*</sup> and Wenyi Mi<sup>2\*</sup>

\*Corresponding author. Email: dongcheng@tmu.edu.cn or wenyi.mi@tmu.edu.cn

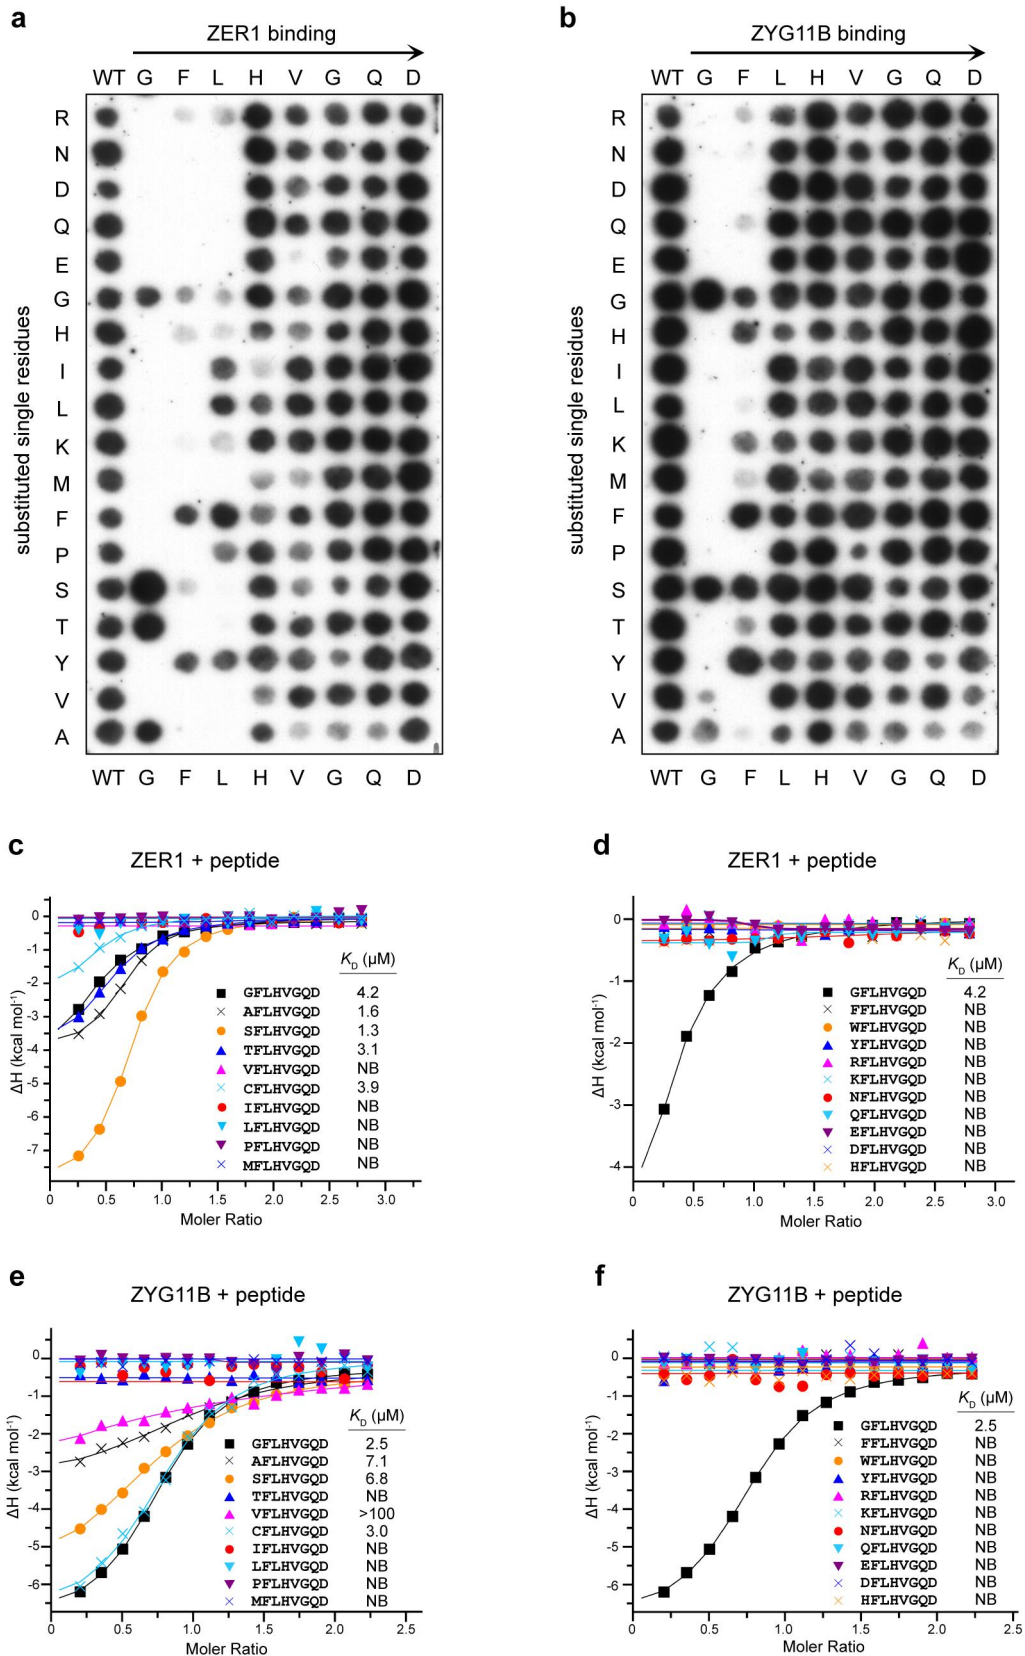

**Supplementary Fig. 1 | Interactions of XFLHVGQD (X is the set of 20 amino acids in the genetic code) peptide with human ZER1 and ZYG11B. a-b Binding patterns of GST-tagged ZER1<sub>1469-766</sub> and ZYG11B<sub>490-744</sub> to an array of the spotted GFLHVGQDGLLELPTS peptide (top row,**

denoted “wild-type” [WT]) and its indicated derivatives containing mutations in the first 8 positions. Representative images, n=3. **c-d** ITC fitting curves of ZER1 (residues 469–766) titrated by XFLHVGQD peptides. **e-f** ITC fitting curves of ZYG11B (residues 490–728) titrated by a series of XFLHVGQD peptides. The corresponding peptide sequences and binding affinities are indicated. NB, no detectable binding.

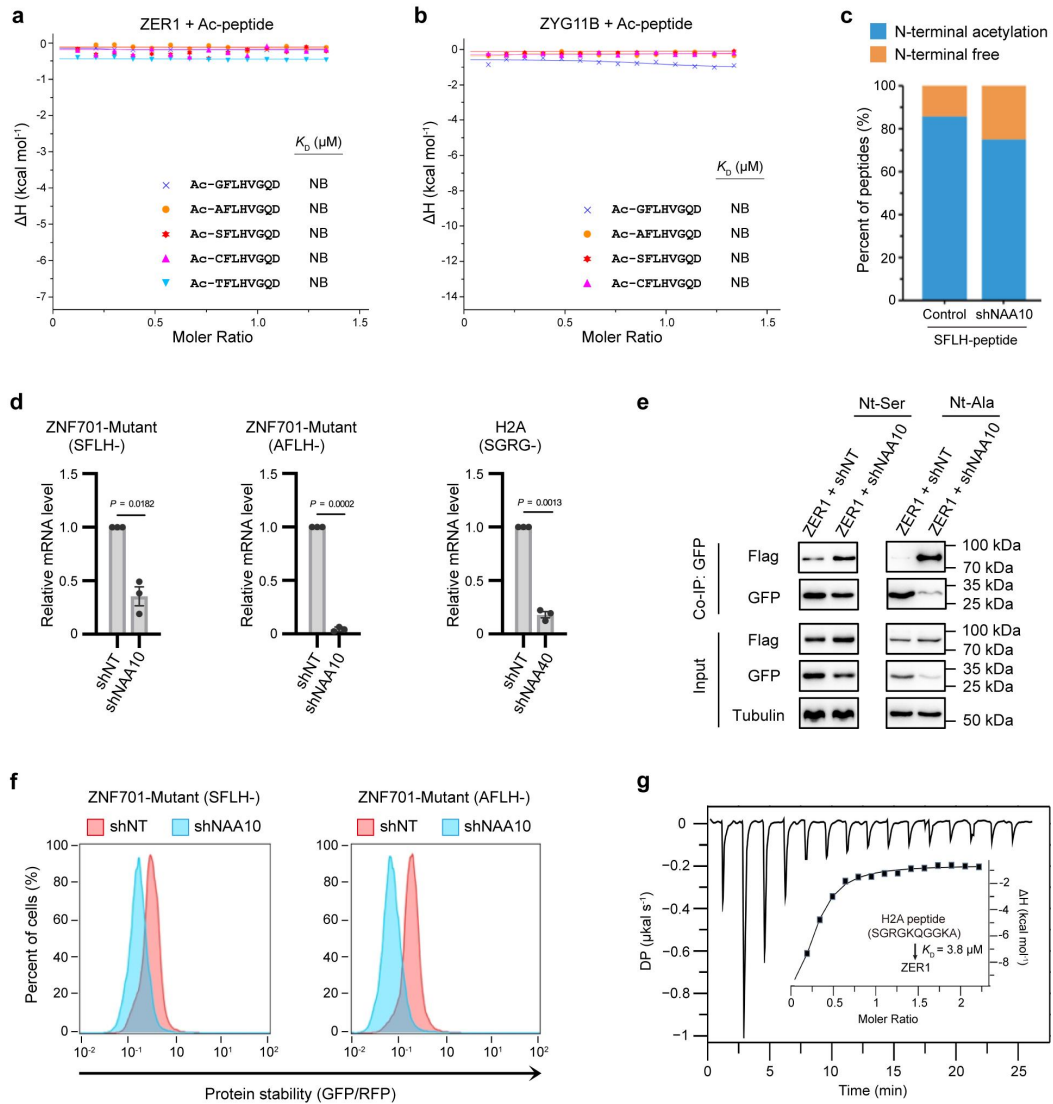

**Supplementary Fig. 2 | Nt-Ac shields the substrates from recognition by ZER1.** a-b ITC measurements of the interactions of ZER1 (residues 469–766) or ZYG11B (residues 490–728) with Nt-Ac peptides. NB, no detectable binding. c LC-MS analysis of acetylation levels of Ub-SFLH-GFP in the NAA10-knockdown cells. d The relative mRNA levels of NAA10 or NAA40 in their knockdown cells. Error bars represent the standard error of mean (s.e.m.). Data are mean  $\pm$  s.e.m..  $P$  values were determined using unpaired two-tailed Student's t-tests;  $n=3$  biologically independent samples. e Co-IP analysis of the interactions of full-length ZER1 with SFLH- or AFLH-fused GFP. HEK293T cells expressing Ub-SFLH-GFP or Ub-AFLH-GFP were infected with Flag-tagged full-length ZER1 lentivirus, then the infected cells were selected for stable cells, which were subsequently infected by NAA10 shRNA lentivirus. Cells were collected and used for Co-IP experiments. Representative images,  $n=3$ . Uncropped western blot images are provided in Source data 1. f Stability analysis of SFLH-GFP or AFLH-GFP in NAA10 knockdown cell lines. The ratio of GFP/RFP was analyzed by flow cytometry. FACS sequential gating strategies are provided in Supplementary Fig. 6. g ITC titration and fitting curves of ZER1 (residues 469–766) binding to the H2A histone peptide.

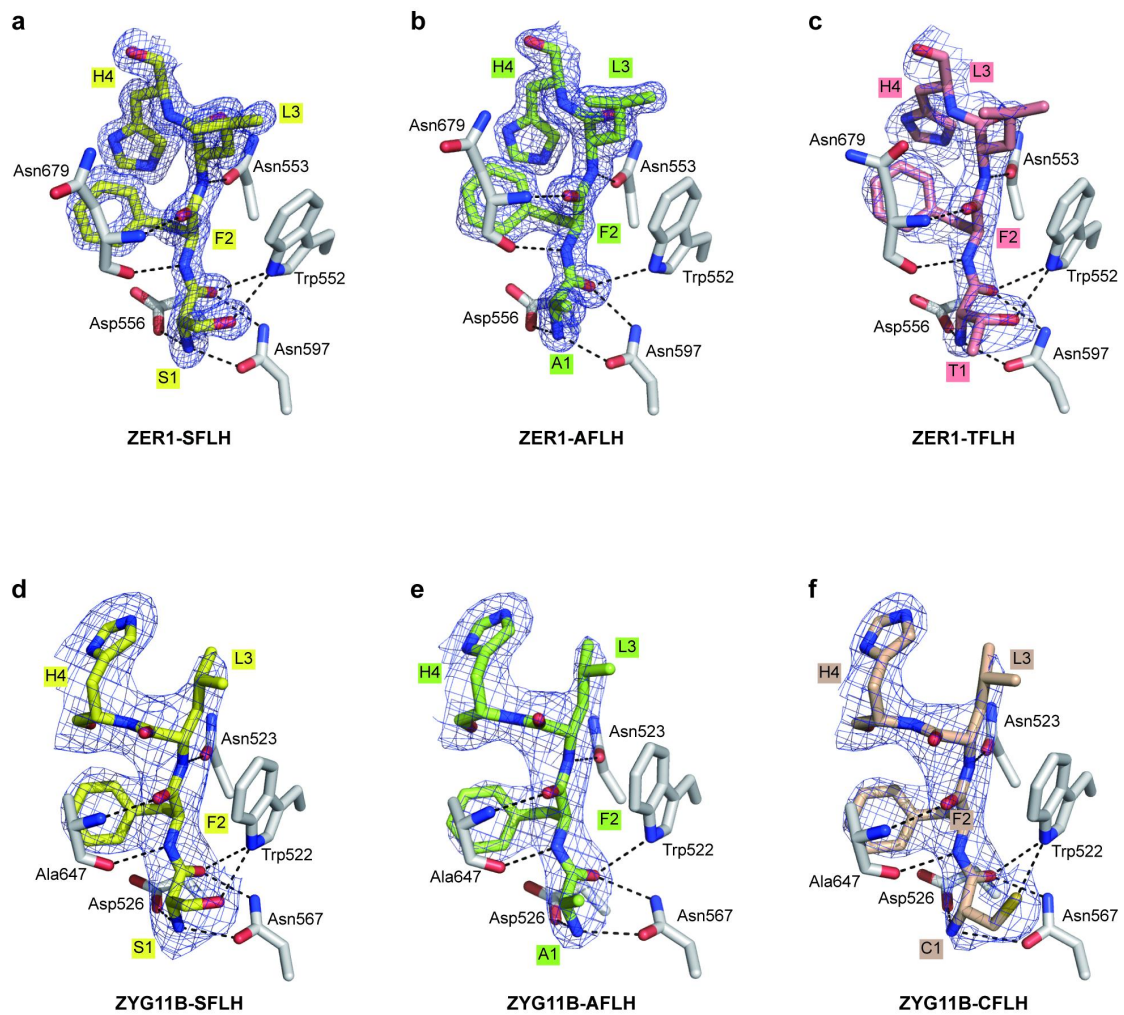

**Supplementary Fig. 3 | Structural details of different peptides bound to ZER1 and ZYG11B.**

The peptides are depicted as yellow (SFLH), palegreen (AFLH), pink (TFLH) and palebrown (CFLH) sticks. ZER1 and ZYG11B are depicted as gray sticks. **a** SFLH in ZER1-SFLH complex; **b** AFLH in ZER1-AFLH complex; **c** TFLH in ZER1-TFLH complex; **d** SFLH in ZYG11B-SFLH complex; **e** AFLH in ZYG11B-AFLH complex; **f** CFLH in ZYG11B-CFLH complex. 2Fo–Fc electron density maps (blue mesh) of the peptides are contoured at the 1.0 - 1.5 $\sigma$  level.

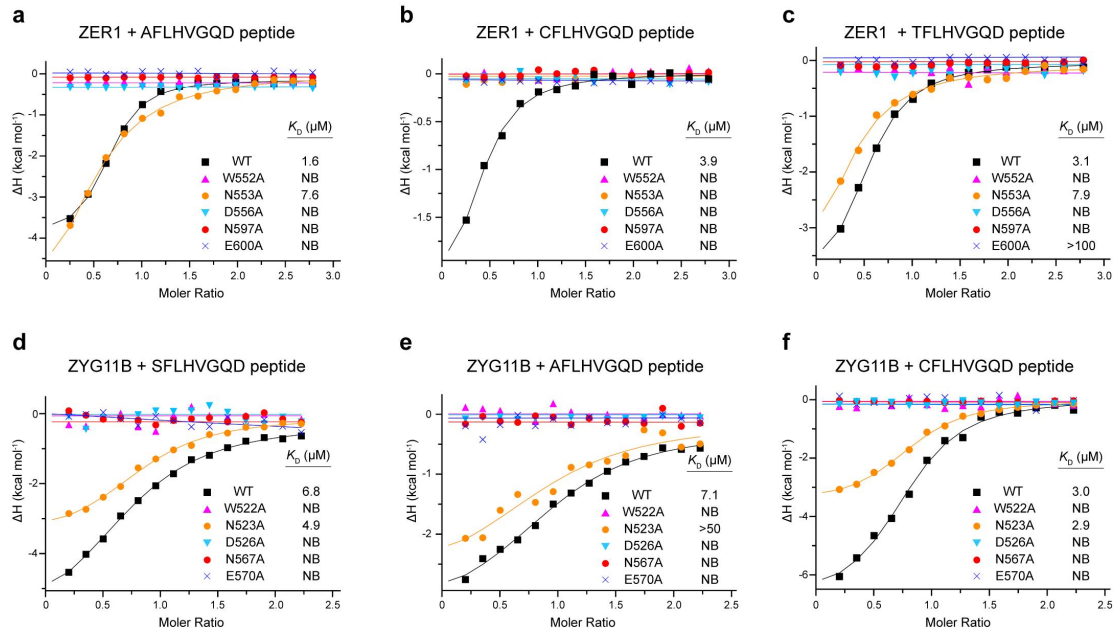

**Supplementary Fig. 4 | ITC measurements of wild-type (WT) and mutant proteins binding to XFLHVGQD. a-c** Binding affinities of ZER1 with XFLHVGQD (X = A, C or T); **d-f** Binding affinities of ZYG11B with XFLHVGQD (X = S, A or C). The corresponding mutations and binding affinities ( $K_{DS}$ ) are indicated. NB, no detectable binding.

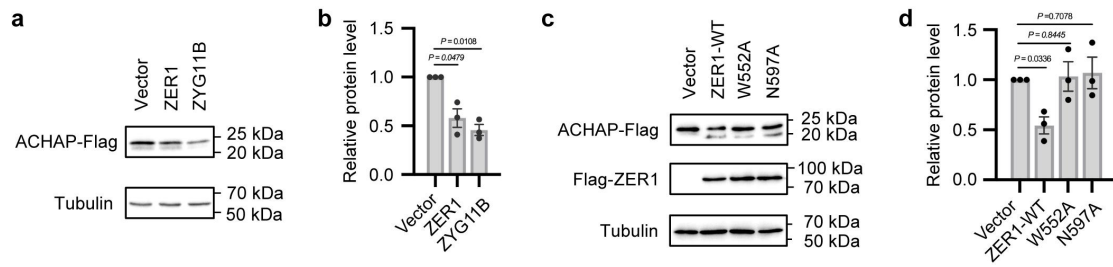

**Supplementary Fig. 5** | Western blotting analysis of ACHAP (acetylcholinesterase-associated protein) stability. **a** Stability analysis of ACHAP full-length protein with overexpression of ZER1 or ZYG11B in HEK293T cells by western blotting. Representative images,  $n=3$ . **b** The relative protein levels of ACHAP were quantified with Gel Image System (Tanon-5200) and normalized to  $\alpha$ -tubulin according to the results of three experiments. Error bars represent the standard error of mean (s.e.m.). Data are mean  $\pm$  s.e.m..  $P$  values were determined using unpaired two-tailed Student's  $t$ -tests;  $n=3$  biologically independent samples. **c** Stability analysis of ACHAP full-length protein with overexpression of WT and indicated mutant ZER1 proteins in HEK293T cells by western blotting. Representative images,  $n=3$ . **d** The relative protein levels of ACHAP were quantified with Gel Image System (Tanon-5200) and normalized to  $\alpha$ -tubulin according to the results of three experiments. Error bars represent the standard error of mean (s.e.m.). Data are mean  $\pm$  s.e.m..  $P$  values were determined using unpaired two-tailed Student's  $t$ -tests;  $n=3$  biologically independent samples. Uncropped western blot images are provided in Source data 1.



For Fig. 2b  
ZNF701-WT (GLFH-)

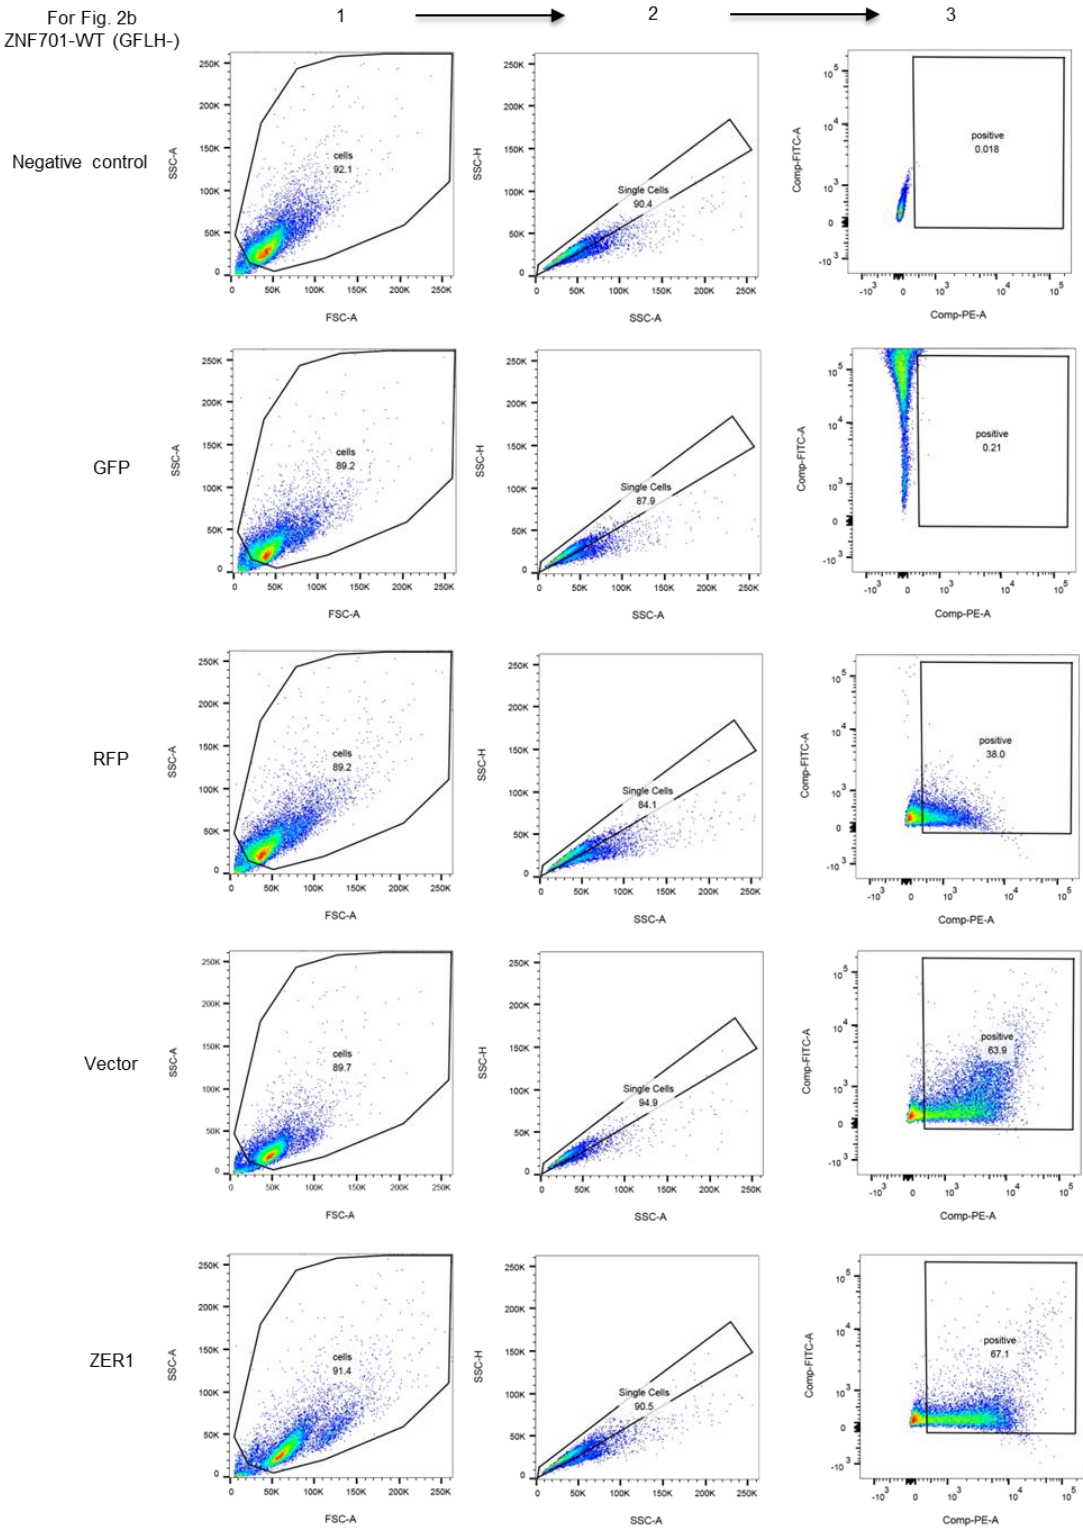



For Fig. 2b  
ZNF701-Mutant (SFLH-)

Negative control

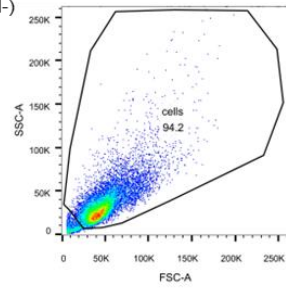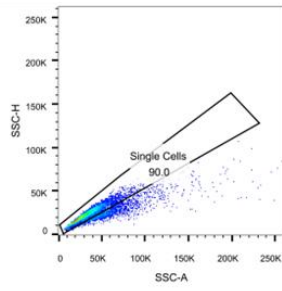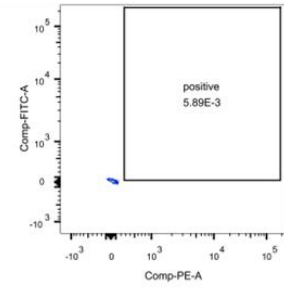

GFP

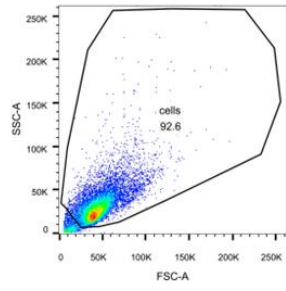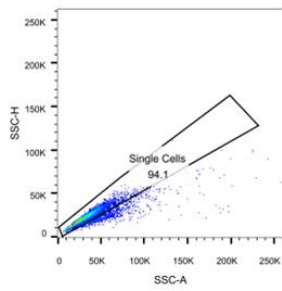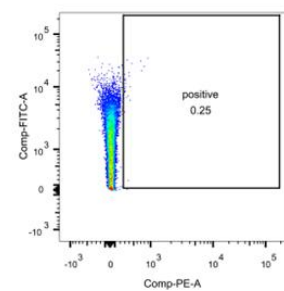

RFP

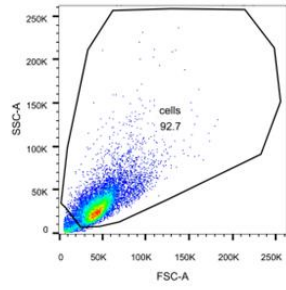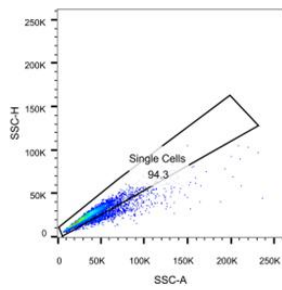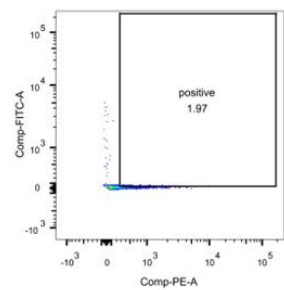

Vector

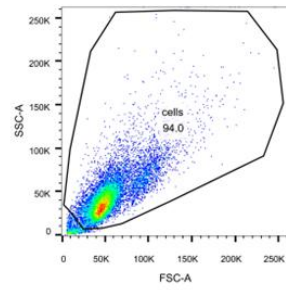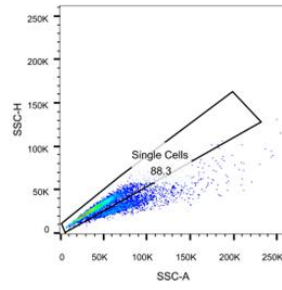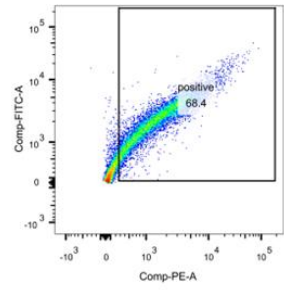

ZER1

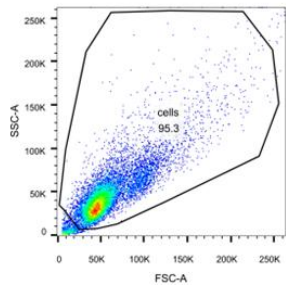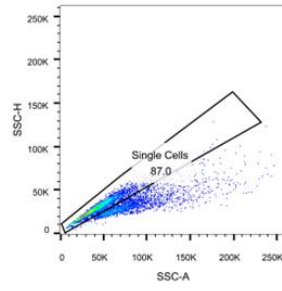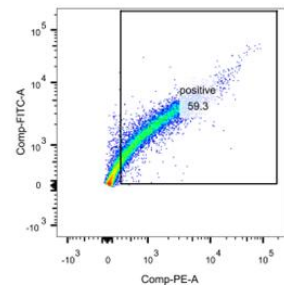

For Fig. 2b  
ZNF701-Mutant (AFLH-)

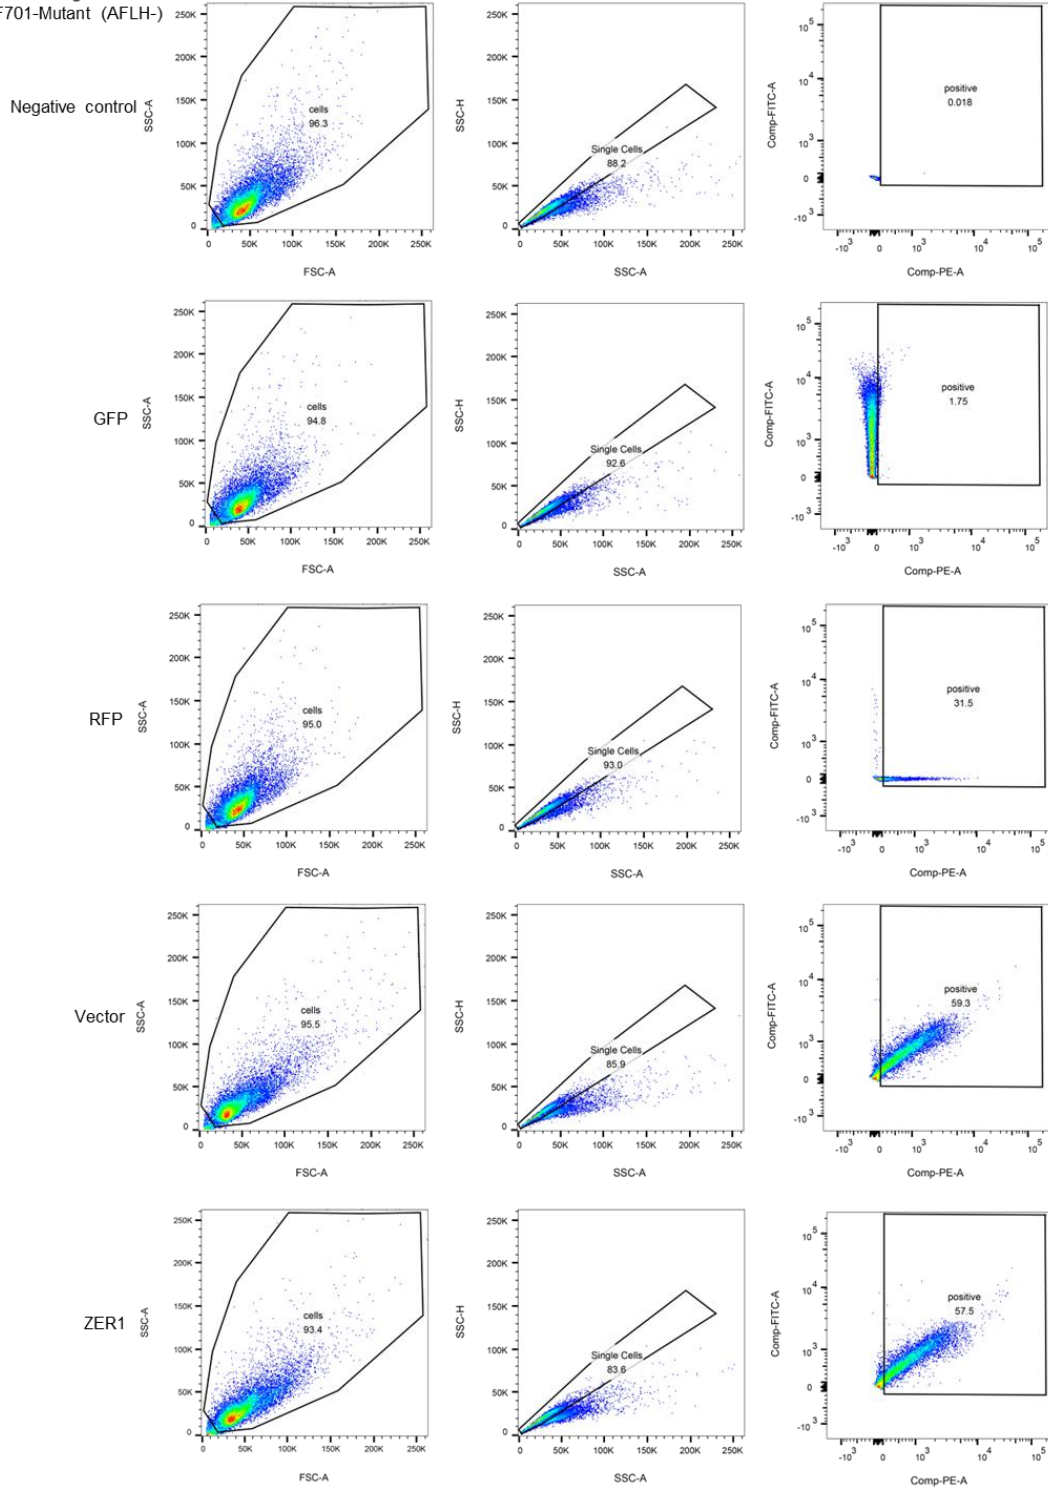

For Fig. 2c  
ZNF701-Mutant (SFLH-)

Negative control

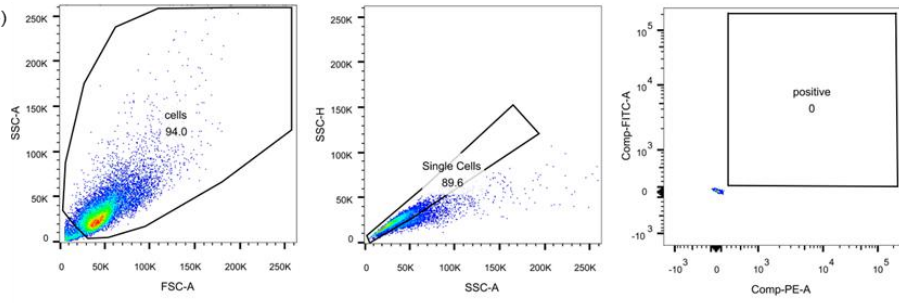

GFP

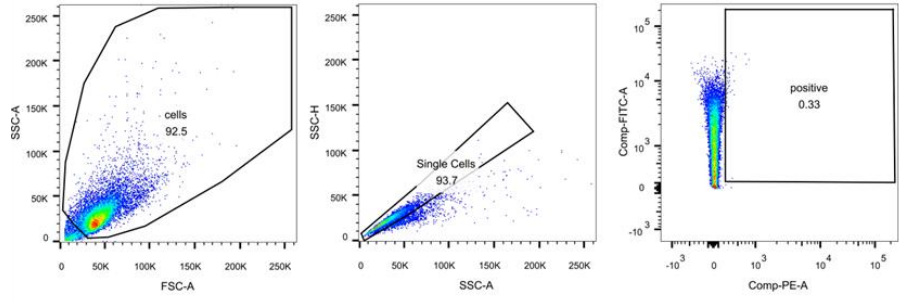

RFP

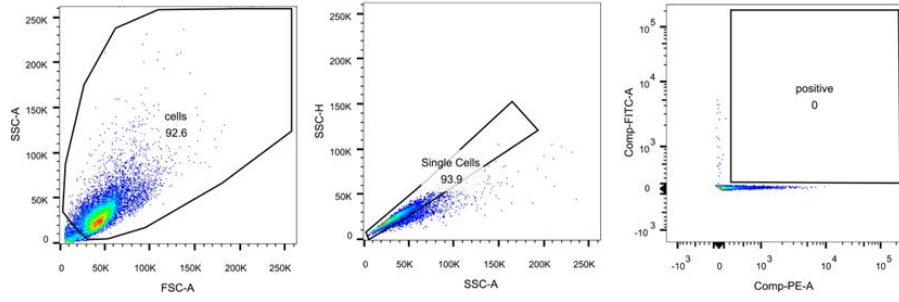

shNAA10+Vector

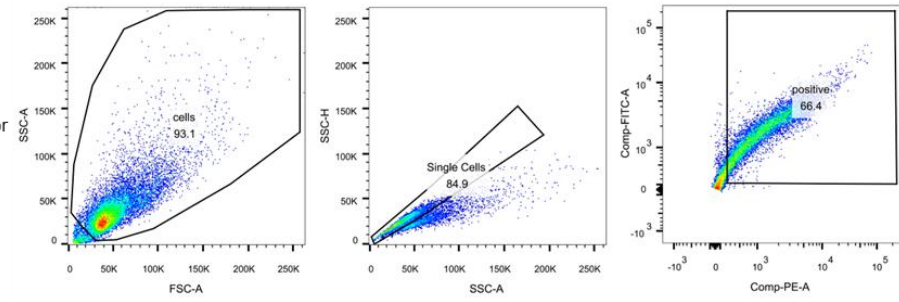

shNAA10+ZER1

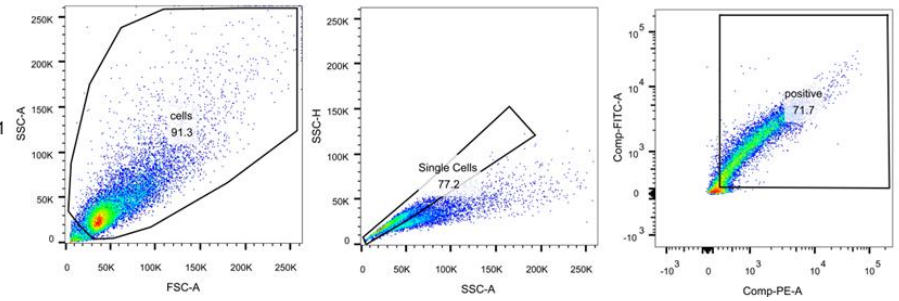

For Fig. 2c  
ZNF701-Mutant (AFLH-)

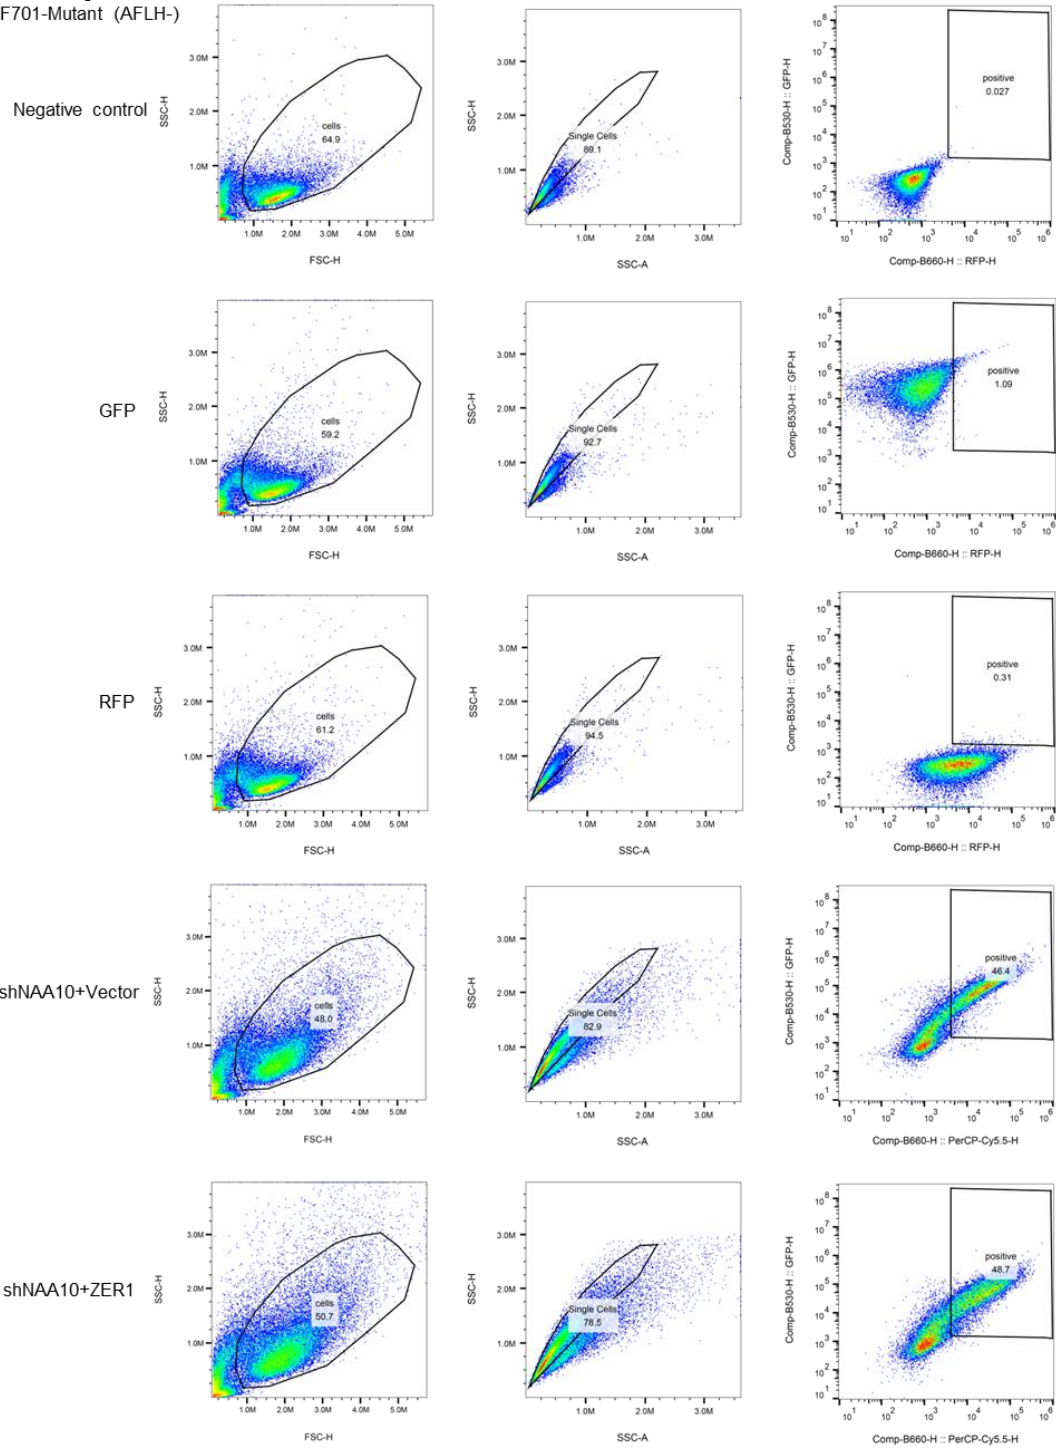



For Fig. 2d  
H2A (SGRG-)

Negative control

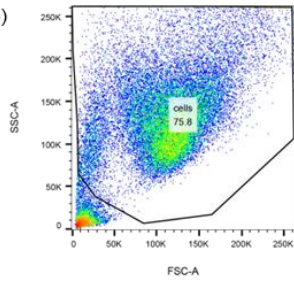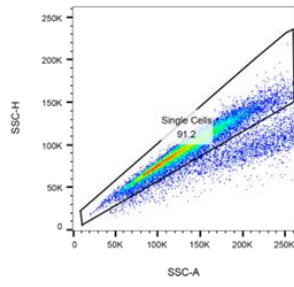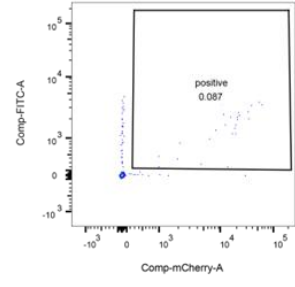

GFP

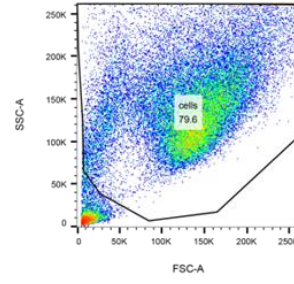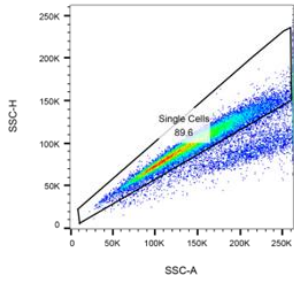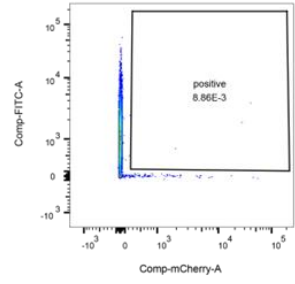

RFP

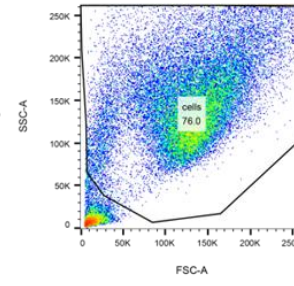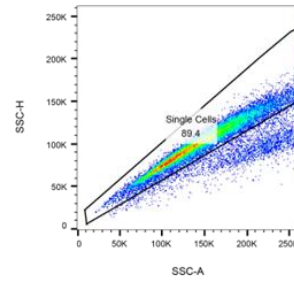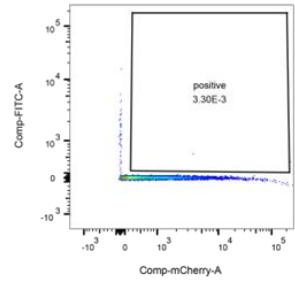

shNAA40+Vector

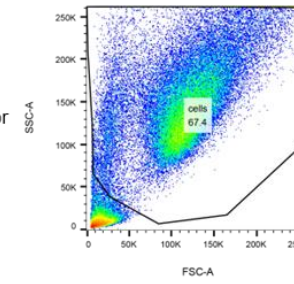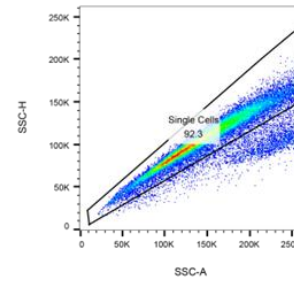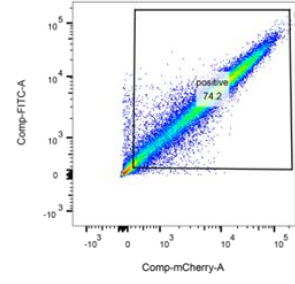

shNAA40+ZER1

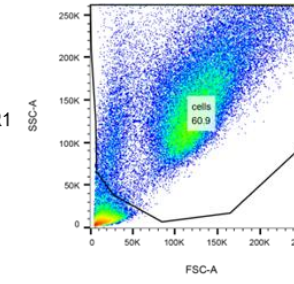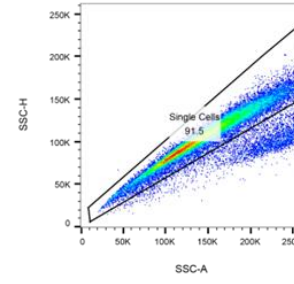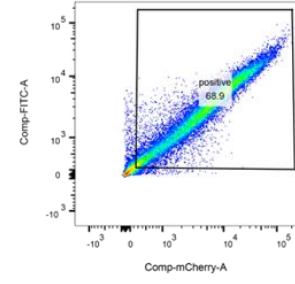

For Fig. 2e  
ZNF701-Mutant (CFLH-)

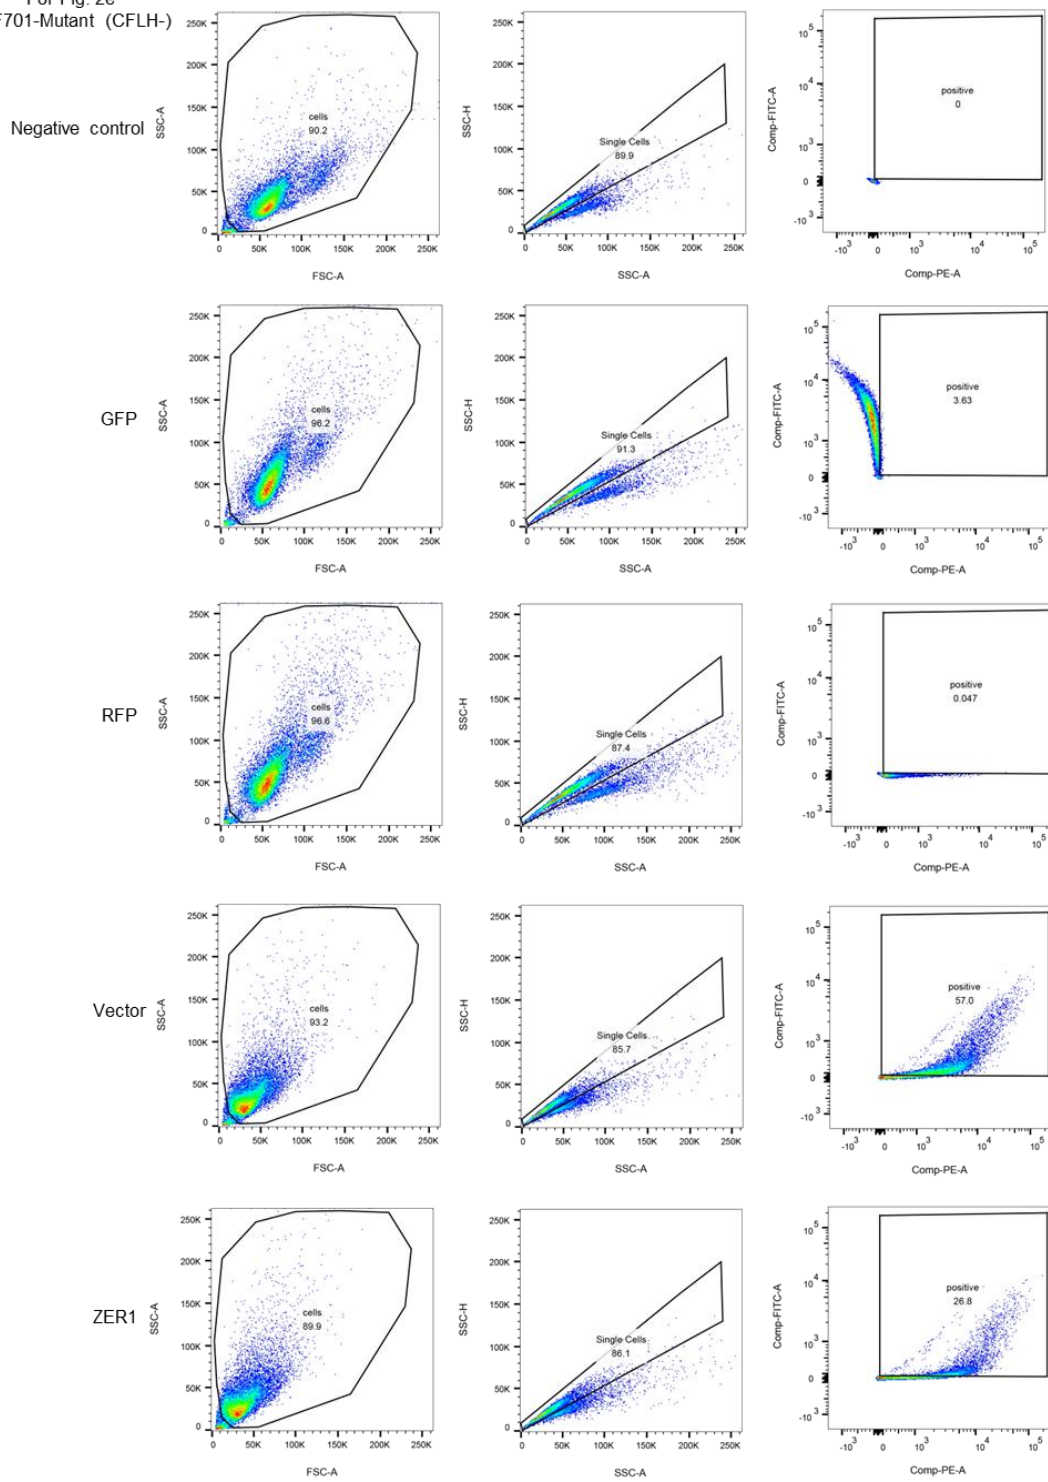

For Fig. 2e  
ZNF701-Mutant (CFLH-)

Negative control

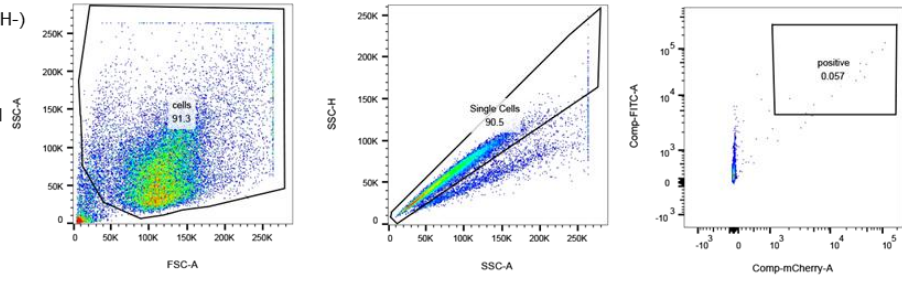

GFP

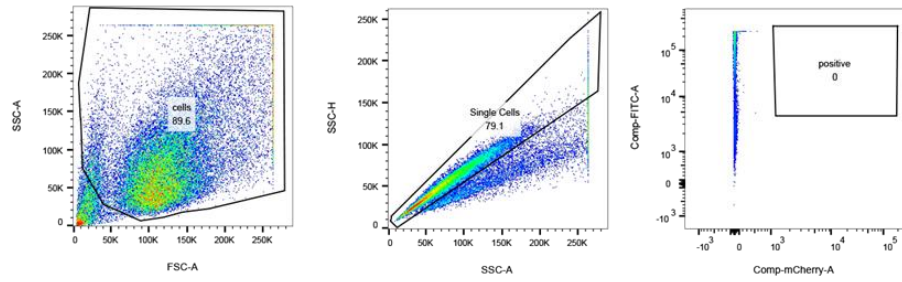

RFP

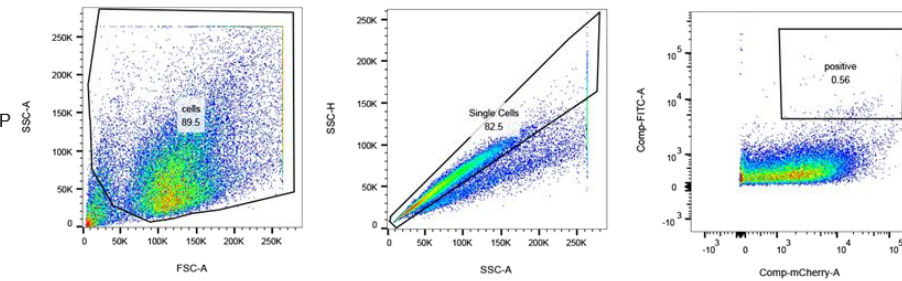

Vector

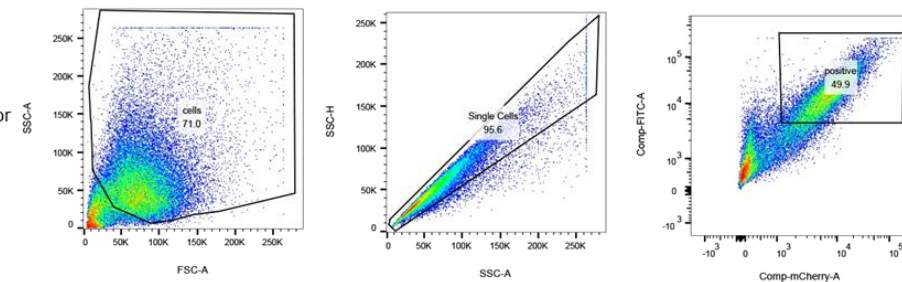

ZYG11B

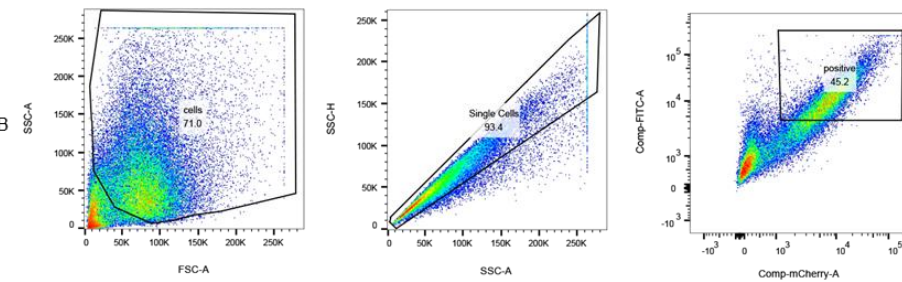



For Fig. 2f  
ZNF701-Mutant (CFLH-)

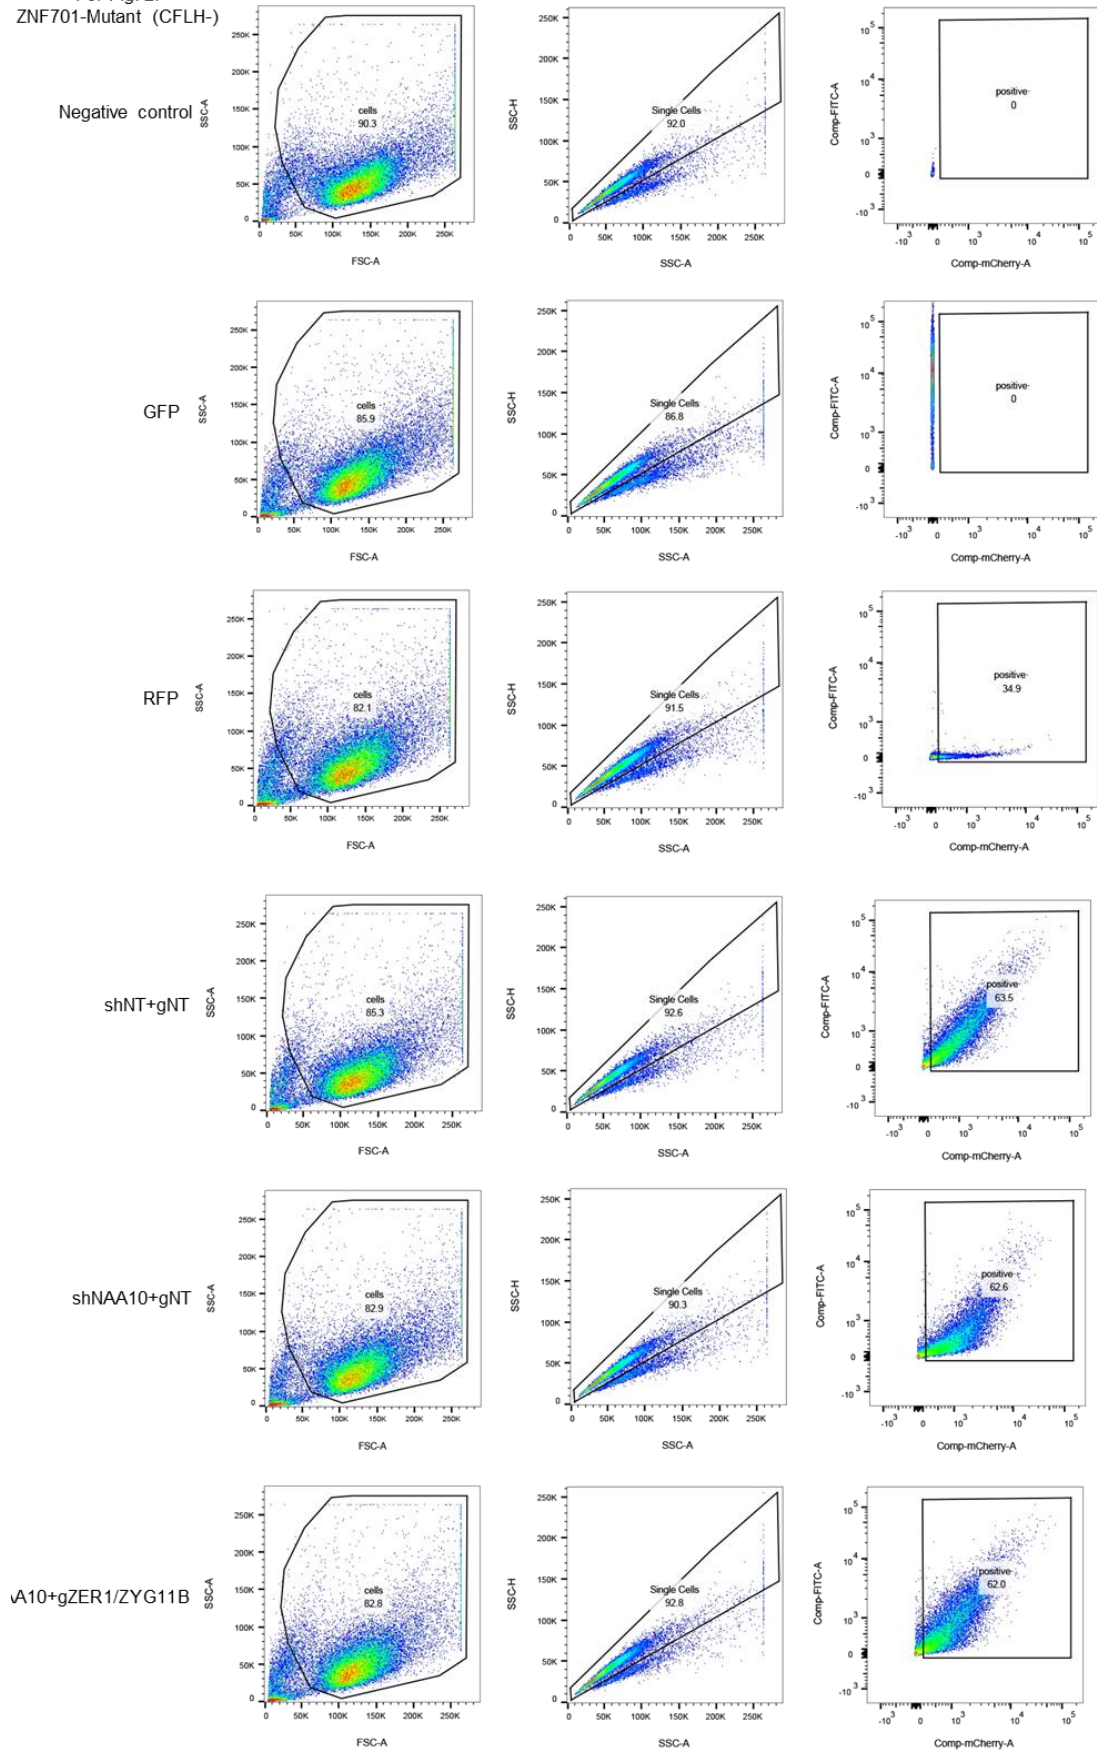

For Fig. 4c  
ZNF701-Mutant (SFLH-)

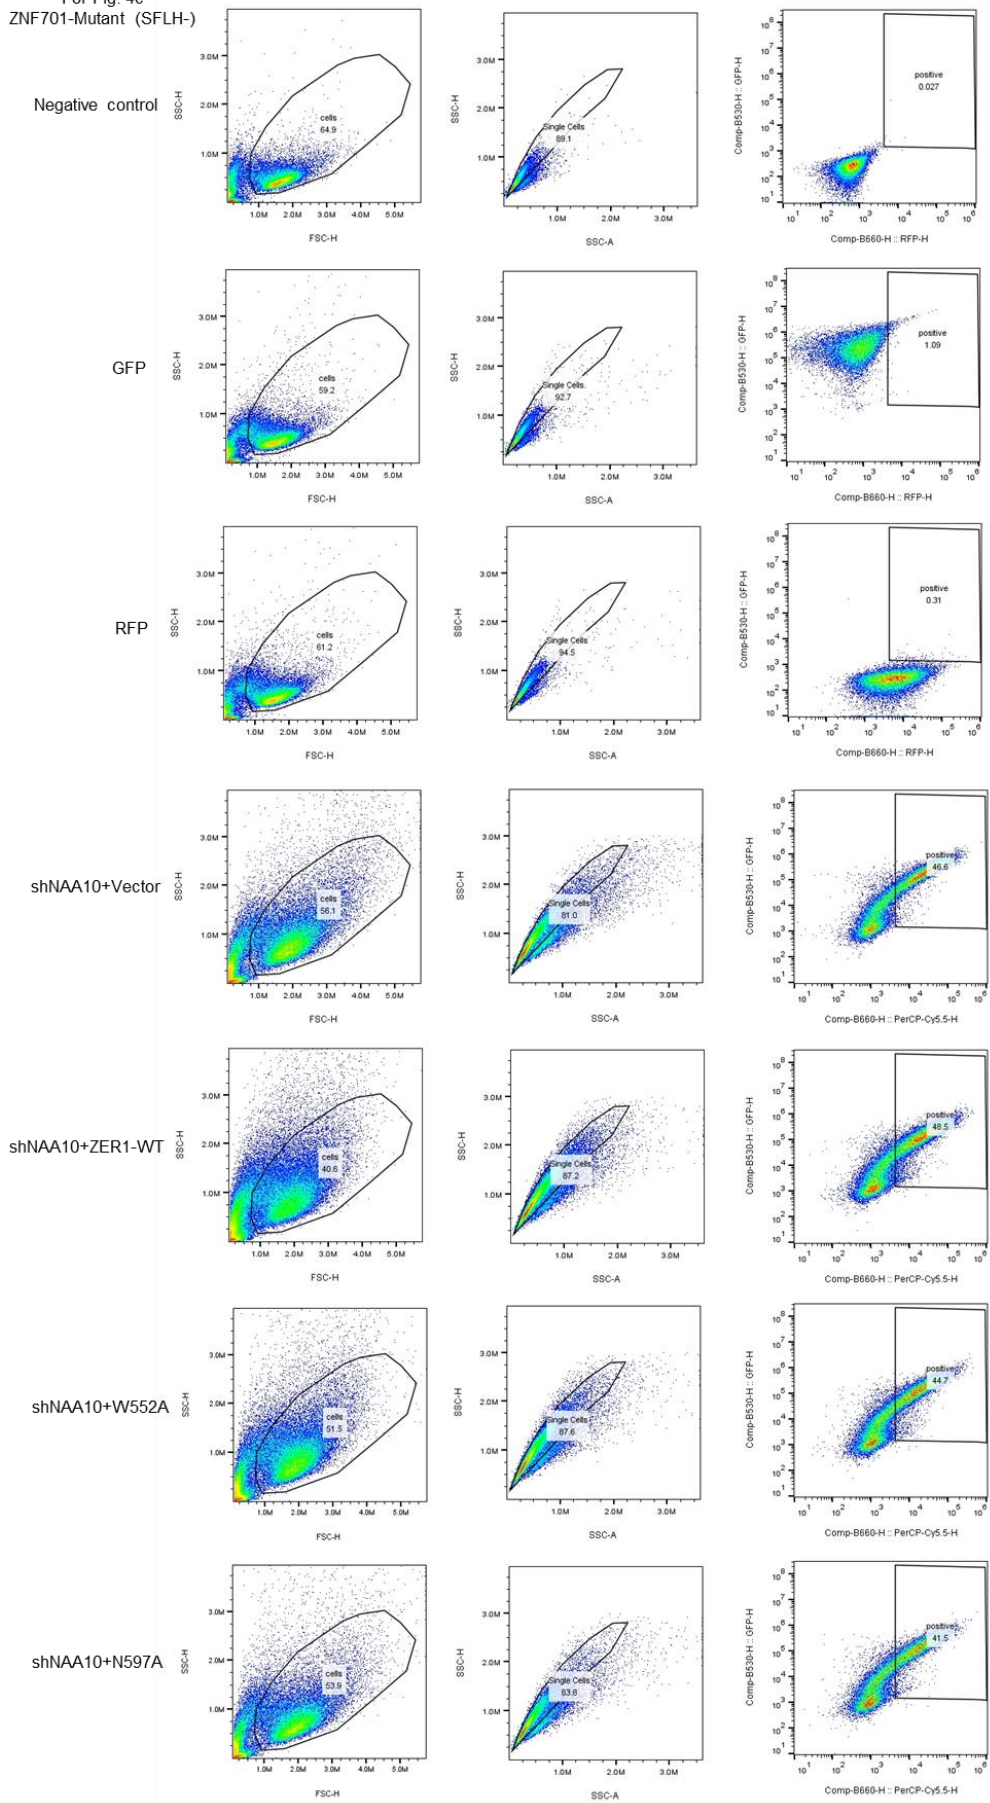

For Fig. 4e  
ZNF701-Mutant (AFLH-)

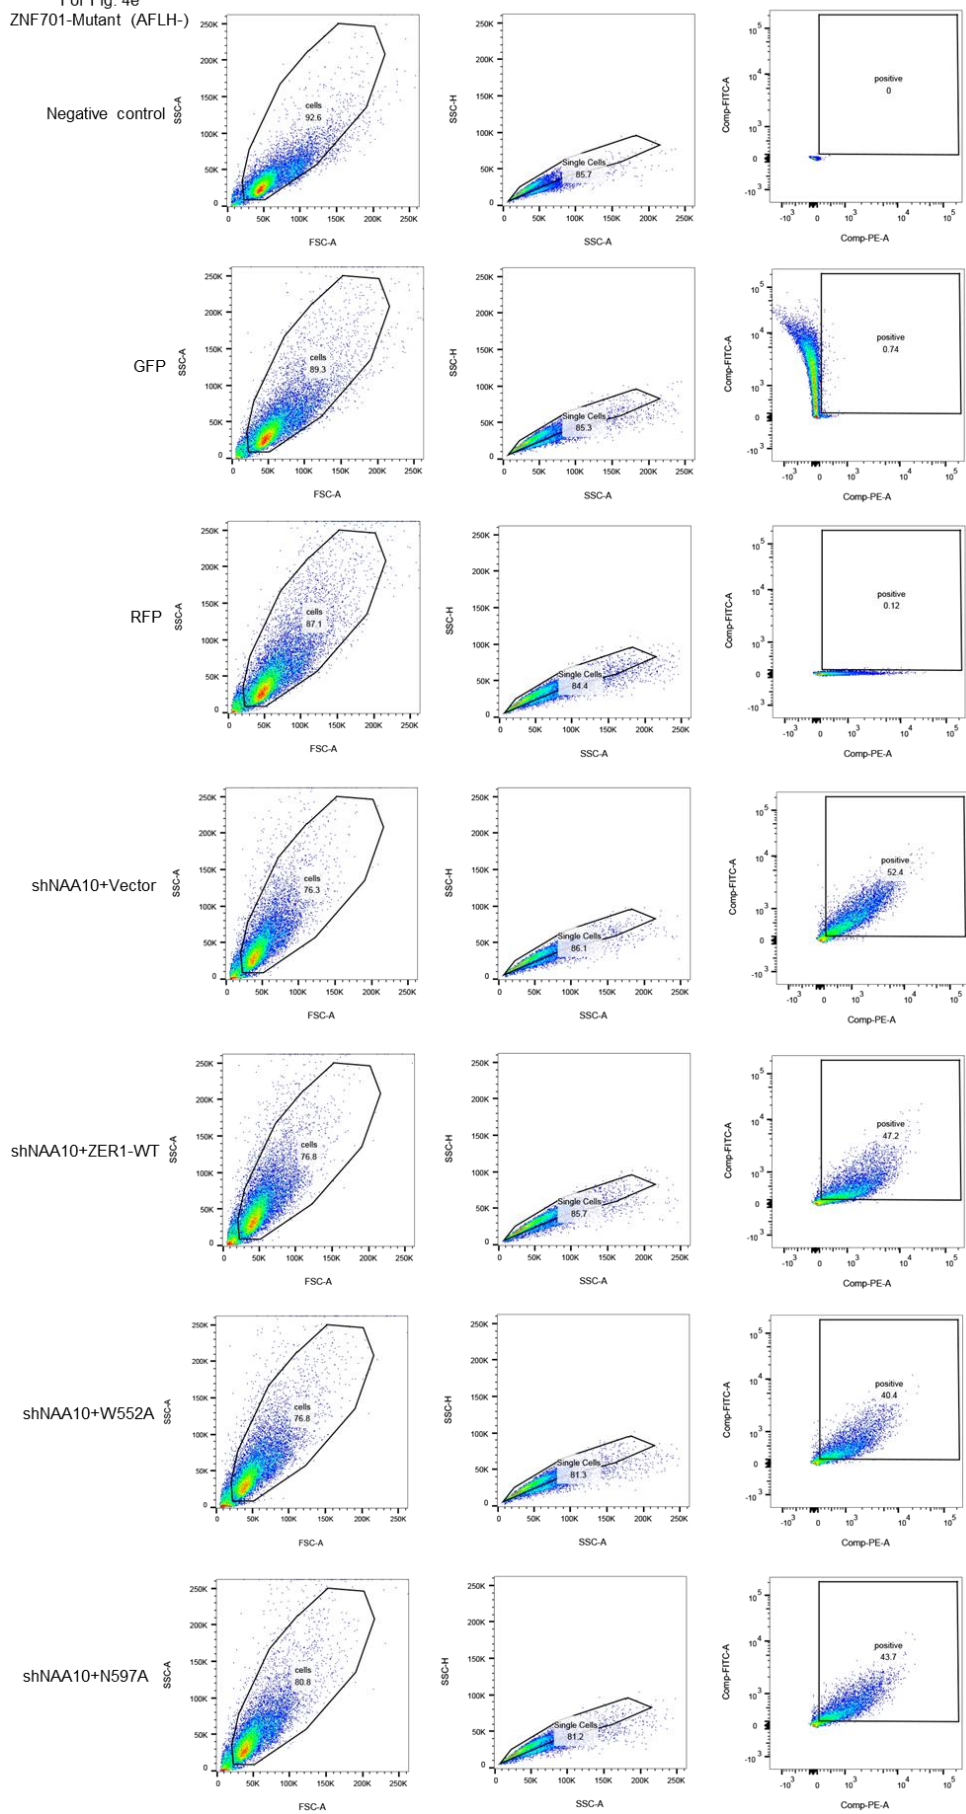



For Fig. 4e  
H2A (SGRG-)

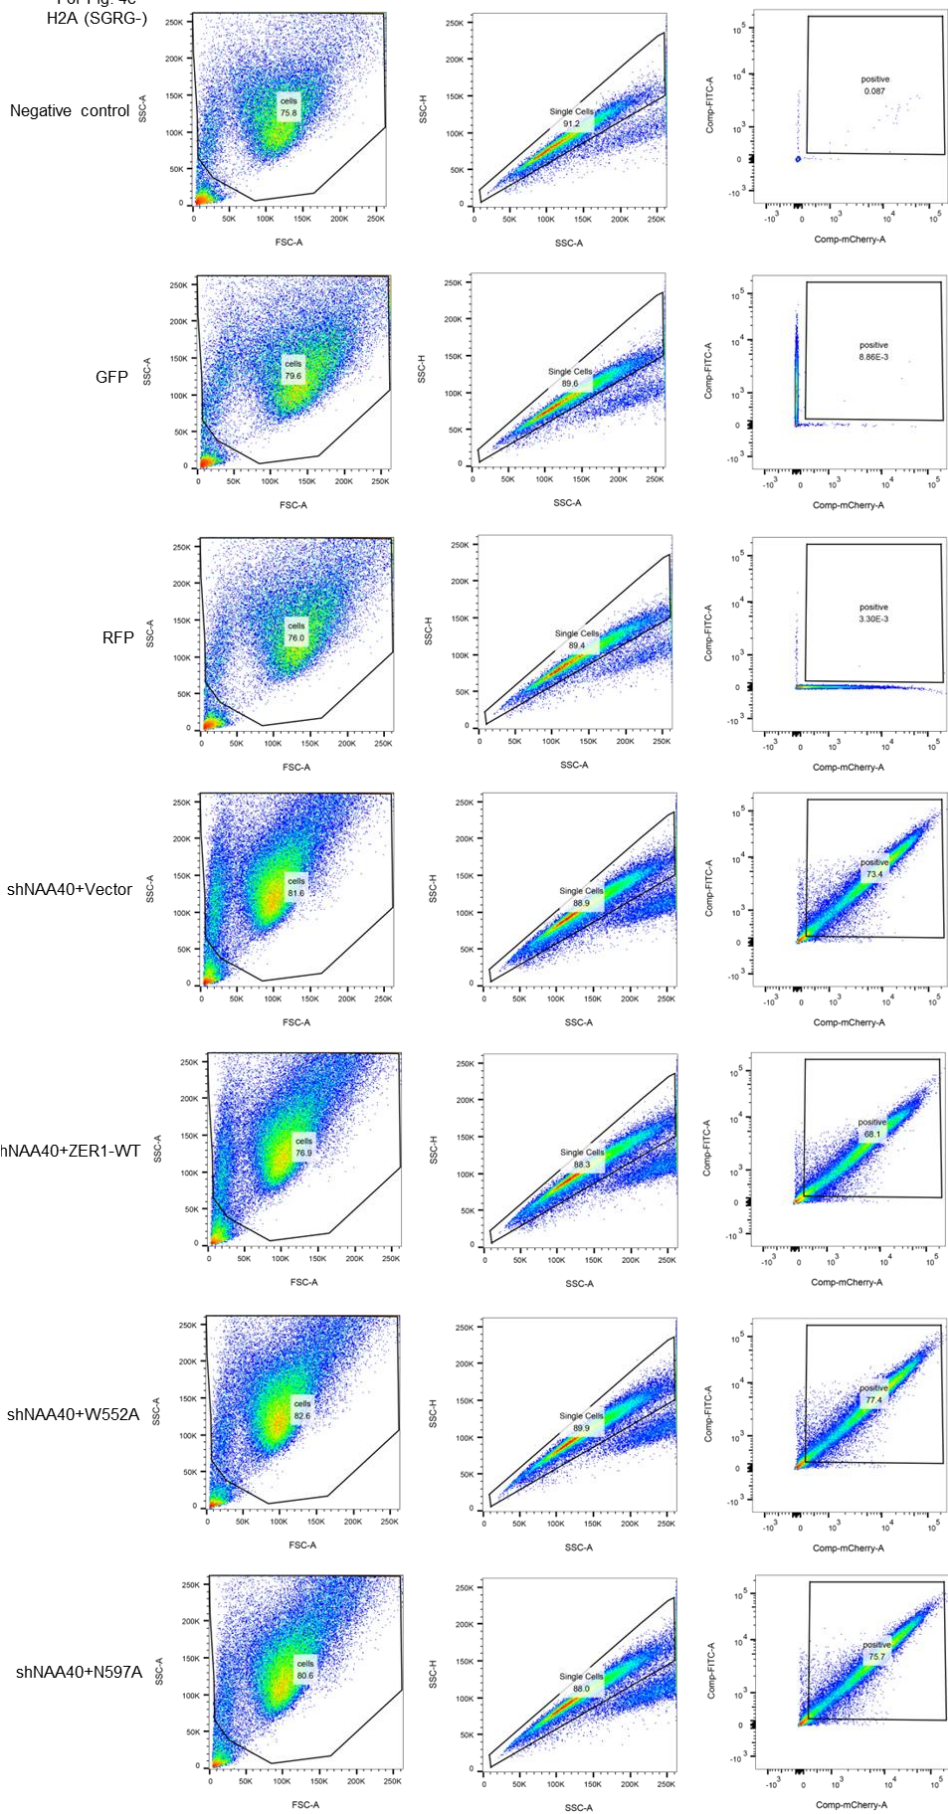

For Fig. 4i  
ZNF701-Mutant (CFLH-)

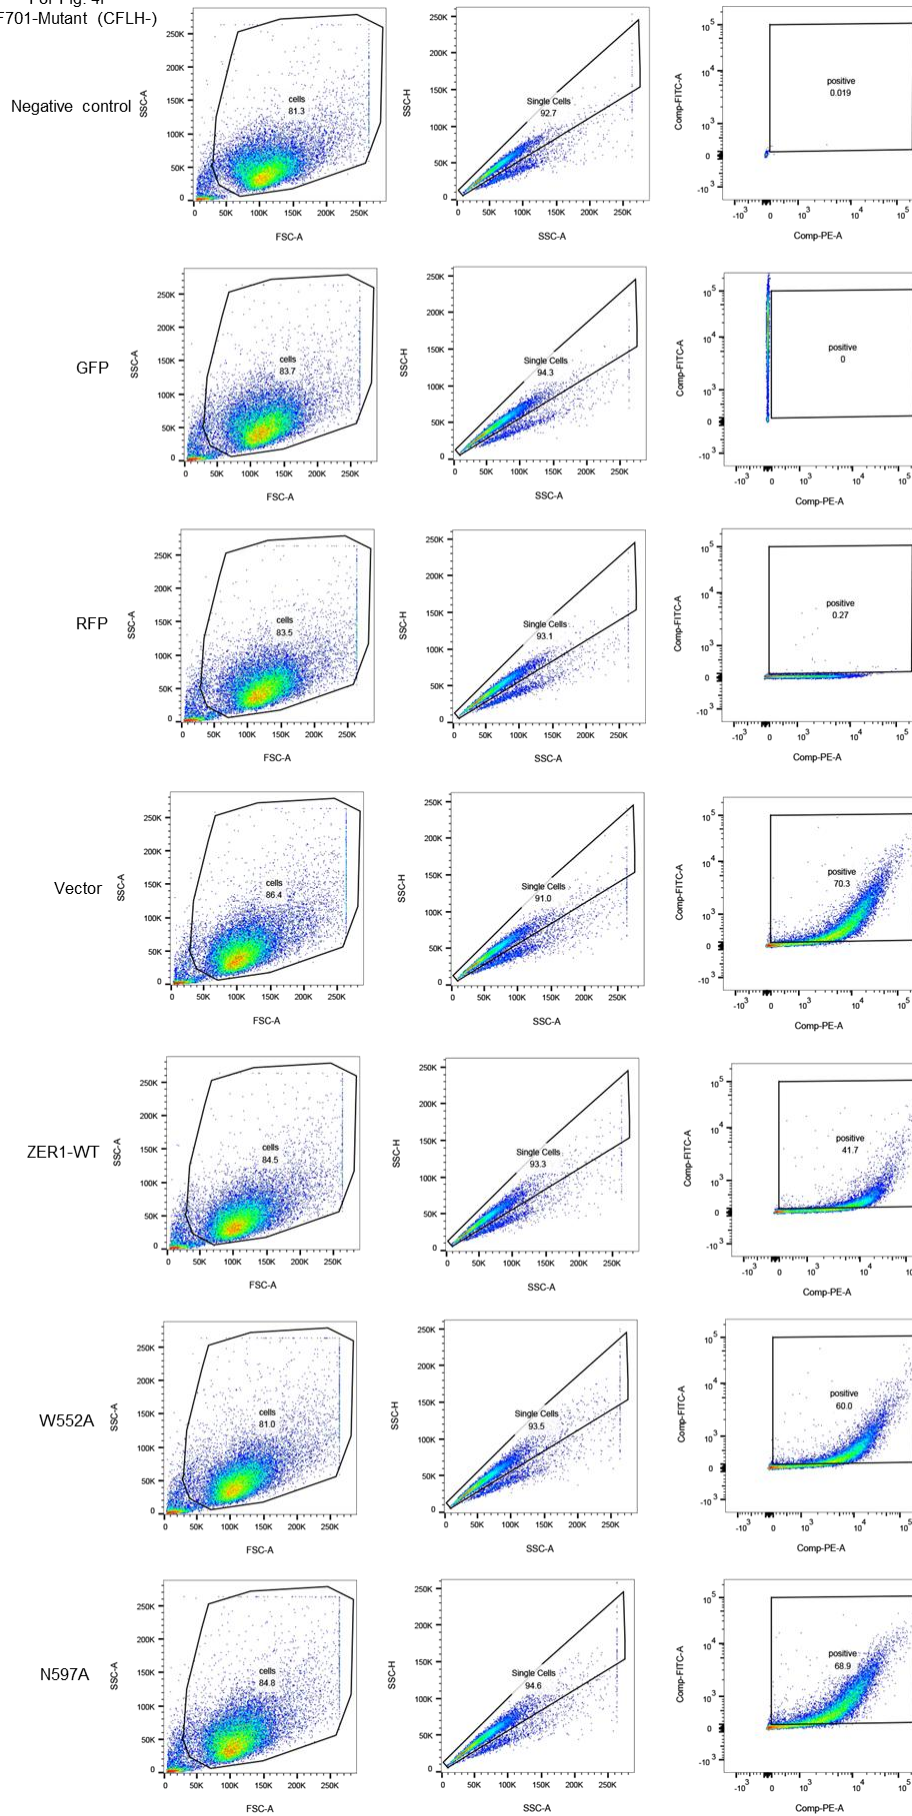

For Supplementary Fig. 2f

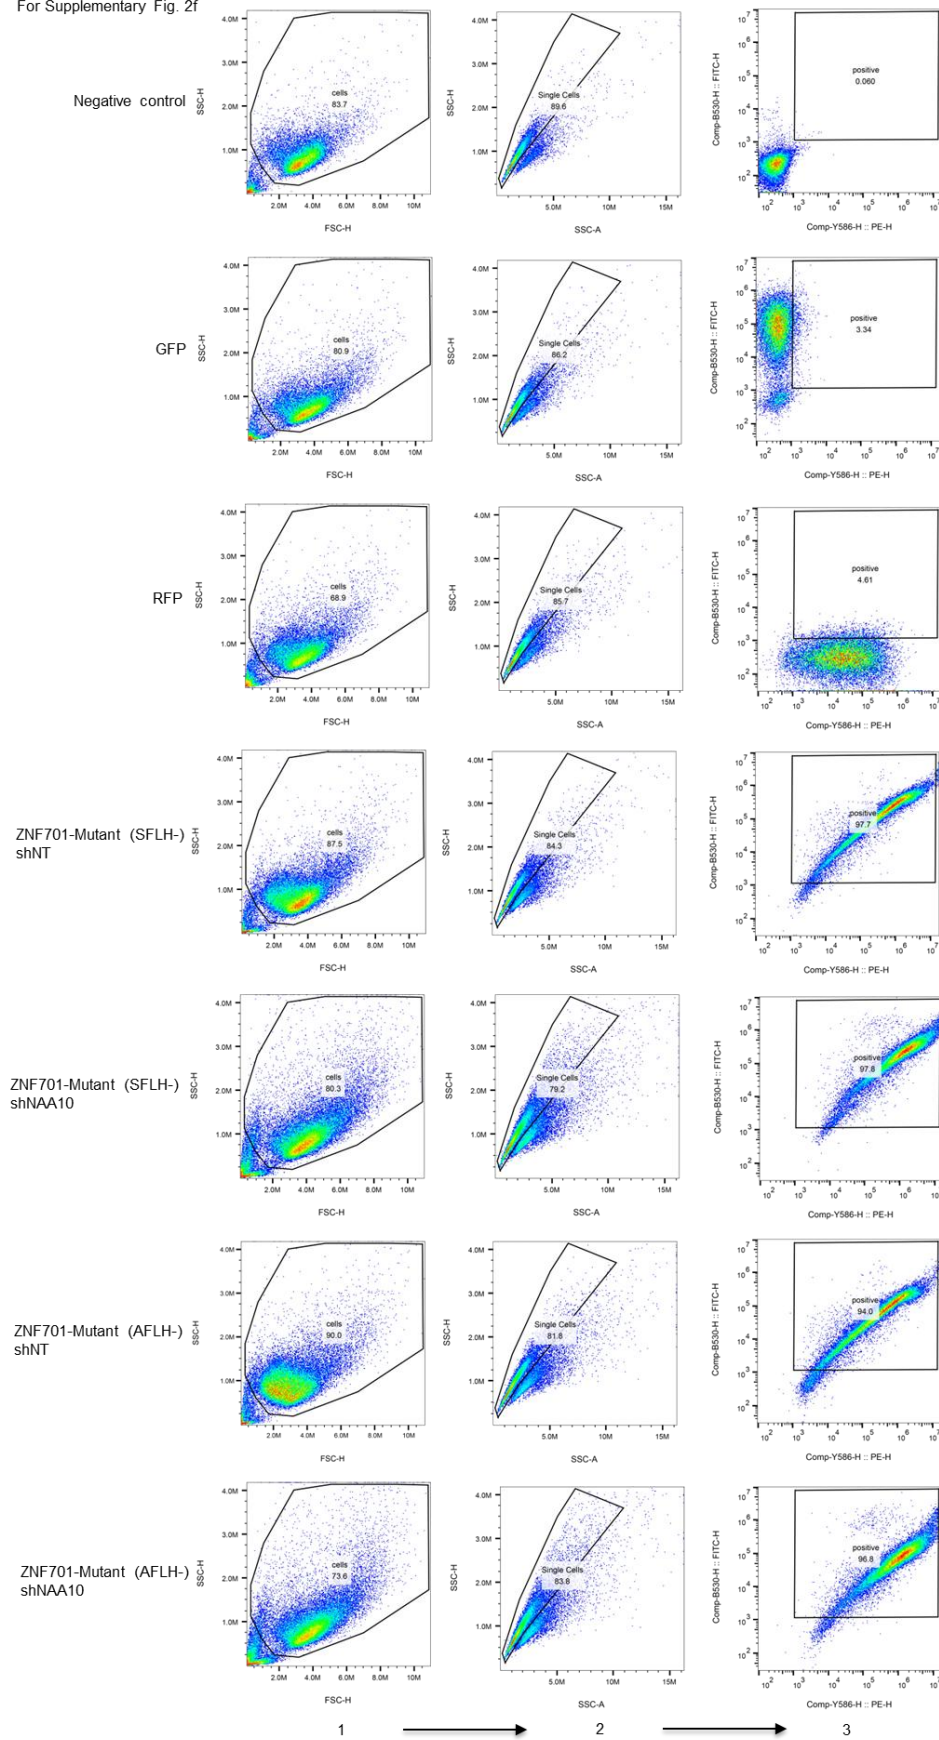

**Supplementary Fig. 6** | Gating images for FACS. 1. Gate on FSC-H vs. SSC-H was set to include

all cell populations, but excluding debris; 2. Gate on SSC-A vs. SSC-H was set to exclude doublets; 3. The selected cells was calculated for GFP/DsRed ratio.
